# Supplementary material for: Expression Profiles of Hypoxia-Related Genes of Cancers Originating from Anatomically Similar Locations Using TCGA Database Analysis
Source: MDPI journal article supplement (doi:10.3390/medicines11010002), 2023-12-31
Supplement: s1 [file s1]

**Table S1. Datasets for hypoxia-related gene list**

| Original     | Approved symbol | Gene group  |
|--------------|-----------------|-------------|
| HIF1A        | HIF1A           |             |
| HIF1B        | ARNT            |             |
| HIF2A (EPAS) | EPAS1           |             |
| HIF2B        | ARNT2           |             |
| HI3A         | HIF3A           |             |
| EPO          | EPO             |             |
| EPOR         | EPOR            |             |
| G6PC         | G6PC            |             |
| G6PC2        | G6PC2           |             |
| G6PC3        | G6PC3           |             |
| G6PD         | G6PD            |             |
| HK1          | HK1             |             |
| HK2          | HK2             |             |
| HK3          | HK3             |             |
| HKDC1        | HKDC1           |             |
| VEGF         | VEGFA           | VEGF family |
|              | VEGFB           | VEGF family |
|              | VEGFC           | VEGF family |
|              | VEGFD           | VEGF family |
|              | PGF             |             |
| PDGF         | PDGFA           | PDGF family |
|              | PDGFB           | PDGF family |
|              | PDGFC           | PDGF family |
|              | PDGFD           | PDGF family |
| PAI1         | SERPINE1        |             |
| SCF          | KITLG           |             |
| BMP4         | BMP4            |             |
| CA IX        | CA9             |             |
| myc          | MYC             |             |
| p53          | TP53            |             |
| VHL          | VHL             |             |
| TGF-B        | TGFB1           |             |
| MMP-1        | MMP1            | MMP family  |
| MMP-2        | MMP2            | MMP family  |
| MMP-3        | MMP3            | MMP family  |

|       |        |             |
|-------|--------|-------------|
| MMP-4 | ILF3   | MMP family  |
| MMP-5 | MMP24  | MMP family  |
| MMP-6 | MMP25  | MMP family  |
| MMP-7 | MMP7   | MMP family  |
| MMP-8 | MMP8   | MMP family  |
| MMP-9 | MMP9   | MMP family  |
|       | MMP10  | MMP family  |
|       | MMP11  | MMP family  |
|       | MMP12  | MMP family  |
|       | MMP13  | MMP family  |
|       | MMP14  | MMP family  |
|       | MMP15  | MMP family  |
|       | MMP16  | MMP family  |
|       | MMP17  | MMP family  |
|       | MMP19  | MMP family  |
|       | MMP20  | MMP family  |
|       | MMP21  | MMP family  |
|       | MMP23A | MMP family  |
|       | MMP23B | MMP family  |
|       | MMP26  | MMP family  |
|       | MMP27  | MMP family  |
|       | MMP28  | MMP family  |
| PI3K  | PIK3R1 | PI3K family |
|       | PIK3R2 | PI3K family |
|       | PIK3R3 | PI3K family |
|       | PIK3R6 | PI3K family |
|       | PIK3R5 | PI3K family |
| MAPK  | MAPK1  | MAPK family |
|       | MAPK3  | MAPK family |
|       | MAPK6  | MAPK family |
|       | MAPK4  | MAPK family |
|       | MAPK14 | MAPK family |
|       | MAPK12 | MAPK family |
|       | MAPK8  | MAPK family |
|       | MAPK11 | MAPK family |
|       | MAPK10 | MAPK family |
|       | MAPK9  | MAPK family |
|       | MAPK13 | MAPK family |
|       | MAPK7  | MAPK family |

|         |         |             |
|---------|---------|-------------|
|         | MAPK15  | MAPK family |
| BRAF    | BRAF    |             |
| NRAS    | NRAS    |             |
| HRAS    | HRAS    |             |
| KRAS    | KRAS    |             |
| PHD3    | EGLN3   |             |
| HDAC-1  | HDAC1   |             |
| HDAC-2  | HDAC2   |             |
| HDAC-3  | HDAC3   |             |
| HDAC-4  | HDAC4   |             |
| HDAC-5  | HDAC5   |             |
| HDAC-6  | HDAC6   |             |
| HDAC-7  | HDAC7   |             |
| HDAC-8  | HDAC8   |             |
| HDAC-9  | HDAC9   |             |
| HDAC-10 | HDAC10  |             |
| HDAC-11 | HDAC11  |             |
| SLC2A1  | SLC2A1  |             |
| SLC2A2  | SLC2A2  |             |
| SLC2A3  | SLC2A3  |             |
| SLC2A4  | SLC2A4  |             |
| SLC2A5  | SLC2A5  |             |
| SLC2A6  | SLC2A6  |             |
| SLC2A7  | SLC2A7  |             |
| SLC2A8  | SLC2A8  |             |
| SLC2A9  | SLC2A9  |             |
| SLC2A10 | SLC2A10 |             |
| SLC2A11 | SLC2A11 |             |
| SLC2A12 | SLC2A12 |             |
| SLC2A13 | SLC2A13 |             |
| SLC2A14 | SLC2A14 |             |

**Table S2. Datasets Used for External Validation and Log Rank Test Results**

| <b>GEO</b> | <b>Group</b> | <b>log rank p-value</b> | <b>Matched TCGA Type</b> |
|------------|--------------|-------------------------|--------------------------|
| GSE72873   | Upper GI     | 4.8.E-01                | ESCA                     |
| GSE15459   | Upper GI     | 3.6.E-02                | STAD                     |

|           |                     |          |         |
|-----------|---------------------|----------|---------|
| GSE17536  | Lower GI            | 9.8.E-01 | COAD    |
| GSE17537  | Lower GI            | 9.5.E-01 | COAD    |
| GSE17538  | Lower GI            | 7.3.E-01 | COAD    |
| GSE41258  | Lower GI            | 1.2.E-01 | COAD    |
| GSE72970  | Lower GI            | 7.9.E-01 | COAD    |
| GSE119041 | Female reproductive | 1.6.E-02 | UCEC    |
| GSE52903  | Female reproductive | 5.4.E-03 | CESC    |
| GSE13507  | Genitourinary       | 2.6.E-01 | BLCA    |
| GSE19423  | Genitourinary       | 5.5.E-01 | BLCA    |
| GSE31684  | Genitourinary       | 7.7.E-02 | BLCA    |
| GSE29609  | Genitourinary       | 5.1.E-01 | KIRC    |
| GSE11969  | Lung                | 5.0.E-02 | LUAD/SC |
| GSE29013  | Lung                | 6.2.E-01 | LUAD    |
| GSE30219  | Lung                | 4.8.E-01 | LUAD    |
| GSE31210  | Lung                | 1.9.E-04 | LUAD    |
| GSE37745  | Lung                | 3.8.E-01 | LUAD/SC |
| GSE50081  | Lung                | 5.0.E-01 | LUAD    |

ESCA, Esophageal carcinoma esophageal carcinoma; STAD, Stomach adenocarcinoma; CODA, Colon adenocarcinoma; UCEC, Uterine corpus endometrial carcinoma; CESC, Cervical squamous cell carcinoma and endocervical adenocarcinoma; BLCA, Bladder urothelial carcinoma; KIRC, Kidney renal clear cell carcinoma; LUAD, Lung adenocarcinoma; LUSC, Lung squamous cell carcinoma

**Table S3. Gene set enrichment analysis results for DEGs in the Female reproductive group (Top 10)**

| <b>Description</b>           | <b>Enrichment Score</b> | <b>p.adjust</b> |
|------------------------------|-------------------------|-----------------|
| Microtubule based process    | -0.5792769              | 1.64E-21        |
| Cilium organization          | -0.6485697              | 4.60E-20        |
| Cilium movement              | -0.6847378              | 4.57E-19        |
| Epidermis development        | 0.55117449              | 6.71E-18        |
| Keratinocyte defferentiation | 0.6326259               | 2.28E-17        |
| Cornification                | 0.72642571              | 5.68E-17        |
| Microtubule based movement   | -0.59232                | 5.68E-17        |
| Skin development             | 0.56568153              | 8.67E-17        |
| Keratinization               | 0.67393106              | 2.14E-15        |
| Microtubule based formation  | -0.6737431              | 4.68E-15        |

**Table S4. Gene set enrichment analysis results for DEGs in the Lung group (Top 10)**

| <b>Description</b>                             | <b>Enrichment Score</b> | <b>p.adjust</b> |
|------------------------------------------------|-------------------------|-----------------|
| Response to cytokine                           | 0.46734305              | 0.00051058      |
| Defense response                               | 0.41871499              | 0.00051058      |
| Cytokine mediated signaling pathway            | 0.49224008              | 0.00267439      |
| Regulation of defense response                 | 0.53735122              | 0.00267439      |
| Regulation of response of external stimulation | 0.43903768              | 0.00346152      |
| Inflammatory response                          | 0.4871903               | 0.00352808      |
| Cytokine cytokine receptor interaction         | 0.57279785              | 0.00510792      |
| Regulation of cell adhesion                    | 0.53904955              | 0.00757874      |
| Cell migration                                 | 0.3254014               | 0.00793285      |
| Cell chemotaxis                                | 0.51092724              | 0.00793285      |
